# Supplementary material for: The complete mitochondrial genome sequence of Oryctes rhinoceros (Coleoptera: Scarabaeidae) based on long-read nanopore sequencing
Source: PeerJ journal article supplement (doi:10.7717/peerj.10552), 2021-01-13
Supplement: peerj-48591-SupplementalFigure1.pdf [file peerj-48591-SupplementalFigure1.pdf]

1 10 20 30 40 50 60 70 80 90 100 110  
1,674 1,683 1,693 1,703 1,713 1,723 1,733 1,743 1,753 1,763 1,773 1,783

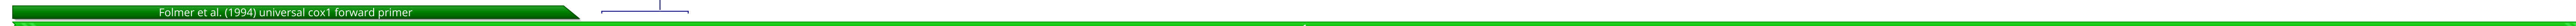

Oryctes rhinoceros mitochondrial genome - cox1 PCR Product  
Frame 1  
Complement  
G G A G G T T T C G G A A A T T G A C T T G T T C C A T T A A T A C T T G G A G C C C C A G A T A T A G C A T T T C C A C G A A T A A A T A A C A T A A G A T T T T G A C T T C T T C C T C C C T C T T T G A C T C T A C T T C T A G C A A  
C C T C C A A A G C C T T T A A C T G A A C A A G G T A A T T A T G A A C C T C G G G G T C T A T A T C G T A A A G G T G C T T A T T T A T T G T A T T C T A A A C T G A G A T G A A G A T C G T T

120 130 140 150 160 170 180 190 200 210 220 230  
1,793 1,803 1,813 1,823 1,833 1,843 1,853 1,863 1,873 1,883 1,893 1,903

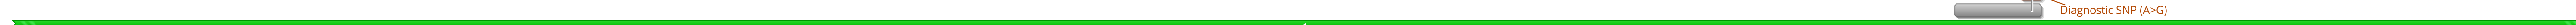

Oryctes rhinoceros mitochondrial genome - cox1 PCR Product  
Frame 1  
Complement  
G A A G A C T A G T A G A A A C G G T G C A G G A A C T G G T T G A A C A G T A T A T C C T C C C T C T C T G C A A A T A T T G C C C A T A G A G G A G C A T C A G T A G A C T T A G C A A T T T T A G A C T T C A T C T T G C C G G  
S S L V E N G A G T G W T V Y P P L S A N I A H S G A S V D L A I F S L H L A G  
C T T C T G A T C A T C T T T T G C C A C G T C C T T G A C C A A C T T G T C A T A T A G G A G A C G T T T A T A A C G G G T A T C T C C T C G T A G T C A T C T G A A T C G T T A A A A T C T G A A G T A G A A C G G C C

240 250 260 270 280 290 300 310 320 330 340 350  
1,913 1,923 1,933 1,943 1,953 1,963 1,973 1,983 1,993 2,003 2,013 2,023

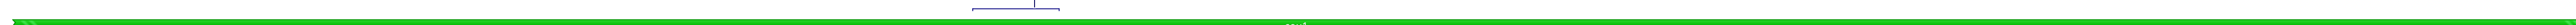

Oryctes rhinoceros mitochondrial genome - cox1 PCR Product  
Frame 1  
Complement  
A A T T T C A T C A A T T C T A G G G G C T G T A A A C T T C A T T A C T A C T G T A A T T A A T A T A C G A T C A A C C G G A A T A A C A T T T G A T C G T A C T C C C C T A T T T G T C T G A T C T G T C A T A C T A A C C G C T A T C  
T T A A A G T A G T T A A G A T C C C C G A C A T T T G A A G T A A T G A T G A C A T T A A T A T A T A T G C T A G T T G G C C T T A T T G T A A A C T A G C A T G A G G G G A T A A A C A G A C T A G A C A G T A T G A T T G G C G A T A G

360 370 380 390 400 410 420 430 440 450 460 470  
2,033 2,043 2,053 2,063 2,073 2,083 2,093 2,103 2,113 2,123 2,133 2,143

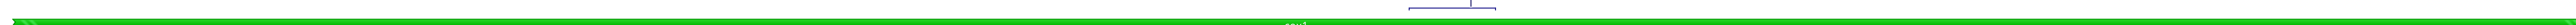

Oryctes rhinoceros mitochondrial genome - cox1 PCR Product  
Frame 1  
Complement  
C T T C T T C T A C T G T C C T T A C C T G T T C T A G C C G G T G C A A T T A C C A T A C T T C T A A C A G A C C G A A A T A T T A A T A C A T T C A T T T T T G A T C C A G C A G G A G G A G G A G A T C C A A A T T T A T A T C A A C  
G A A G A A G A T G A C A G G A A T G G A C A A G A T C G G C C A C G T T A A T G G T A T G A A G A T T G T C T G G C T T T A T A A T A T A T G T A G T A A A A A C T A G G T C G T C C T C C T C C T C T A G G T T A A A A T A T A G T T G

480 490 500 510 520 524  
2,153 2,163 2,173 2,183 2,193 2,197

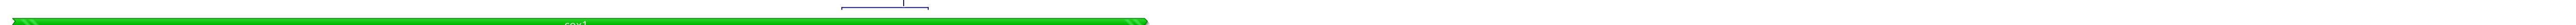

Oryctes rhinoceros mitochondrial genome - cox1 PCR Product  
Frame 1  
Complement  
A C C T A T T C T G A T T T T T G G A C A C C C A G A G G T A T A T A T T T T A A T T C T A C C T G G  
H L F W F F G H P A G E V Y I L I L P  
T G G A T A A G A C T A A A A A C C T G T G G G T C T C C A T A T A T A A A A T T A A G A T G G A C C  
Folmer et al. (1994) universal cox1 reverse primer
